# Supplementary material for: Beyond cadmium yellow: CdS photonic crystal pigments with vivid structural colors
Source: Royal Society of Chemistry journal article supplement (doi:10.1039/d3tc01987j), 2023-01-01
Supplement: d3tc01987j1.pdf [file d3tc01987j1.pdf]

## Supporting Information

### Beyond cadmium yellow: CdS photonic crystal pigments with vivid structural colors

Wuke Wei<sup>#a</sup>, Chengcai Wu<sup>#a</sup>, Qianyao Fang<sup>a</sup>, Zhongwen Zhao<sup>a</sup> and Xin Su<sup>\*a</sup>

*School of Material Science and Chemical Engineering, Ningbo University, Ningbo, Zhejiang, 315211, China.*

**Table S1.** Recipes for preparing monodisperse CdS spheres with various diameters

| Cd(NO <sub>3</sub> ) <sub>2</sub> ·4H <sub>2</sub> O (g) | TU (g) | PVP (g) | DEG (mL) | Diameter (nm) |
|----------------------------------------------------------|--------|---------|----------|---------------|
| 11.72                                                    | 2.89   | 5       | 360      | 150           |
| 12.34                                                    | 3.04   | 5       | 360      | 170           |
| 12.96                                                    | 3.20   | 5       | 360      | 200           |
| 13.57                                                    | 3.35   | 5       | 360      | 220           |

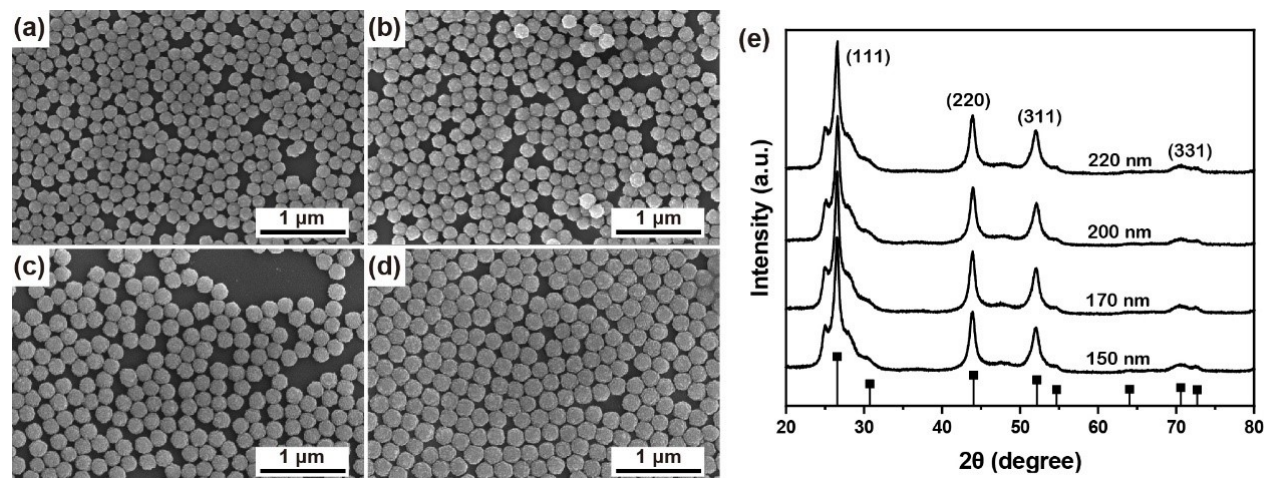

**Figure S1.** SEM images of monodisperse CdS spheres with different diameters: (a) 150 nm; (b) 170 nm; (c) 200 nm; (d) 220 nm; (e) XRD patterns of CdS spheres

**Table S2.** Relations of shell thickness versus reaction time

| Reaction time (min) | thickness (nm) |
|---------------------|----------------|
| 30                  | 5              |
| 60                  | 10             |
| 90                  | 15             |
| 120                 | 20             |

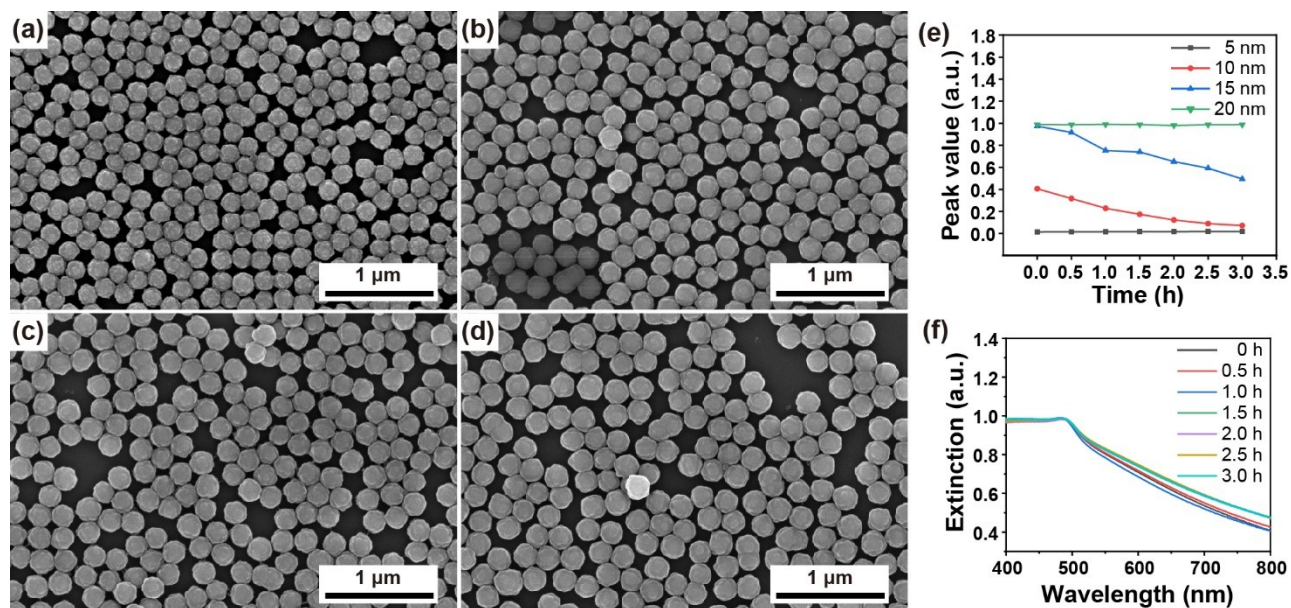

**Figure S2.** SEM images of monodisperse CdS@SiO<sub>2</sub> core-shell spheres with 220 nm CdS as cores and various SiO<sub>2</sub> shell thickness: (a) 5 nm; (b) 10 nm; (c) 15 nm; (d) 20 nm; (e) peak intensity of extinction spectra of CdS@SiO<sub>2</sub> spheres at 480 nm with various shell thickness dispersed into HCl solution for different durations; (f) extinction spectra of 260 nm CdS@SiO<sub>2</sub> spheres (20 nm shell thickness) dispersed in HCl solution for different durations

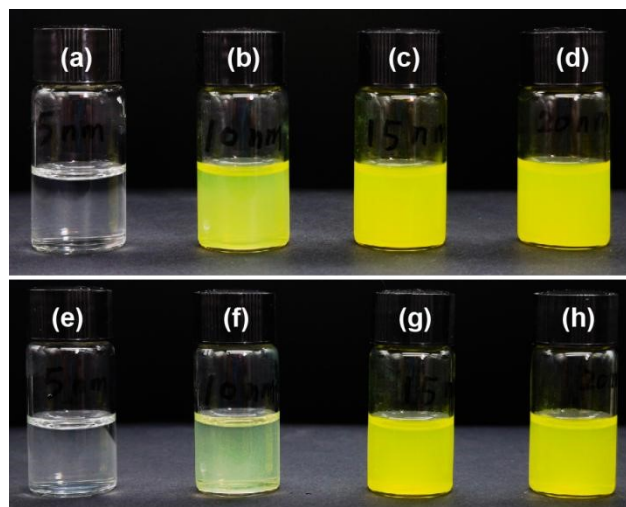

**Figure S3.** Digital photographs of CdS@SiO<sub>2</sub> spheres with various shell thickness dispersed in HCl solution for different durations: (a,e) 5 nm; (b,f) 10 nm; (c,g) 15 nm; (d,h) 20 nm; (a~d) 0 h; (e~h) 3h

**Table S3.** Zeta potential of CdS and CdS@SiO<sub>2</sub> spheres with various diameters

| Spheres              | Diameter (nm) | Zeta potential (mV) |
|----------------------|---------------|---------------------|
| CdS                  | 170           | -29.6               |
|                      | 200           | -30.7               |
|                      | 220           | -29.6               |
| CdS@SiO <sub>2</sub> | 210           | -45.7               |
|                      | 240           | -44.8               |
|                      | 260           | -44.9               |

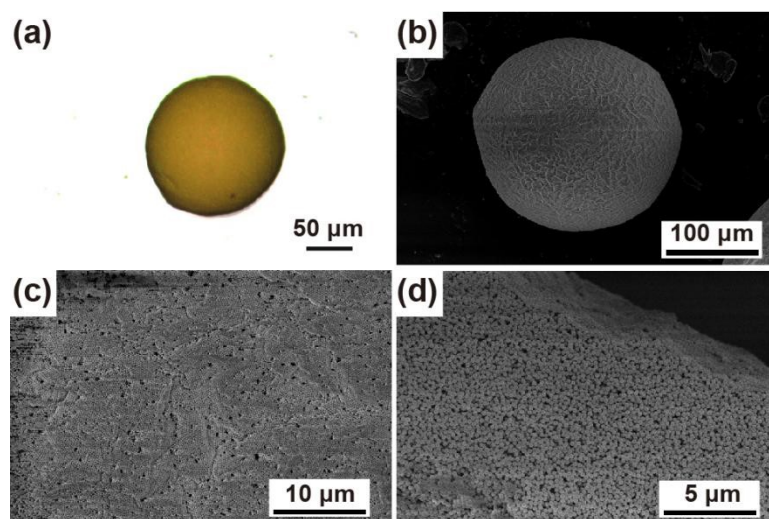

**Figure S4.** (a) Optical image of a CdS PC ball; (b~d) SEM images of a CdS PC ball with different magnification times

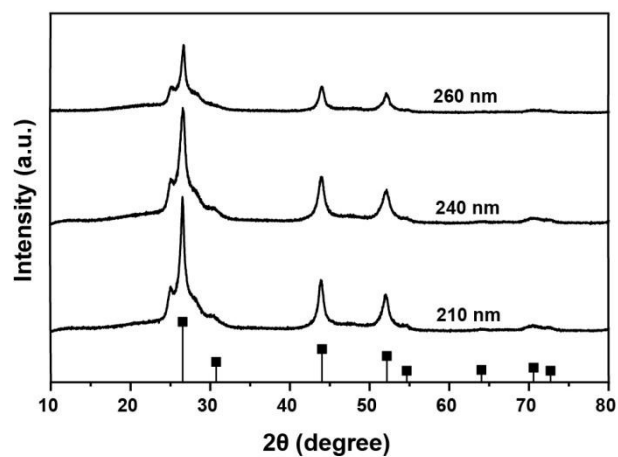

**Figure S5.** XRD patterns of CdS@SiO<sub>2</sub> spheres with different diameters and identical 20 nm SiO<sub>2</sub> shells

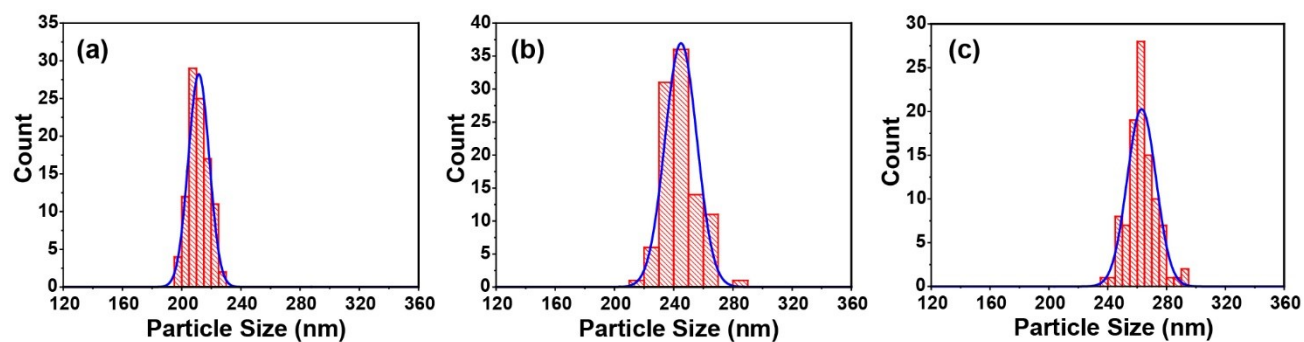

**Figure S6.** Size distribution of CdS@SiO<sub>2</sub> core-shell spheres with various diameters: (a) 210 nm; (b) 240 nm; (c) 260 nm

**Table S4.** Theoretical and measured reflection peaks of CdS@SiO<sub>2</sub> PC balls

| D <sub>core</sub> (nm) | D <sub>core-shell</sub> (nm) | Theoretical peaks (nm) | Measures peaks (nm) |
|------------------------|------------------------------|------------------------|---------------------|
| 170                    | 210                          | 639                    | 524                 |
| 200                    | 240                          | 746                    | 578                 |
| 220                    | 260                          | 817                    | 680                 |

The theoretical reflection peak positions can be calculated based on Bragg diffraction equation (1).

$$\lambda = 2d \sqrt{n_{eff}^2 - \sin^2\theta} \quad (1)$$

$$d = \sqrt{\frac{2}{3}} D \quad (2)$$

$$n_{eff}^2 = f_{sphere} n_{sphere}^2 + f_{air} n_{air}^2 \quad (3)$$

In these three equations,  $d$  is the distance between two neighboring crystalline planes in the (111) direction for a face-centered cubic (fcc) close-packed structure, and its relation with the sphere diameter  $D$  is shown in eqn (2). The effective refractive index ( $n_{eff}$ ) can be approximated according to eqn (3). The incident angle  $\theta$  is 0° for all samples.  $n_{sphere}$  and  $n_{air}$  stand for the refractive index of building blocks and air ( $n=1.00$ ). In a fcc structure, the fill ratios of spheres ( $f_{sphere}$ ) and air ( $f_{air}$ ) are 0.74 and 0.26, respectively. Herein, as the building blocks are actually core-shell composite spheres, their effective refractive index can be approximated by the following equation (4). The refractive index of CdS cores and SiO<sub>2</sub> shells are 2.51 and 1.46, respectively. Based on the above data, the theoretical reflection peak positions can be calculated and summarized in Table S4.”

$$n_{sphere}^2 = \frac{R_{core}^3}{R_{core-shell}^3} * n_{core}^2 + \left(1 - \frac{R_{core}^3}{R_{core-shell}^3}\right) * n_{shell}^2 \quad (4)$$



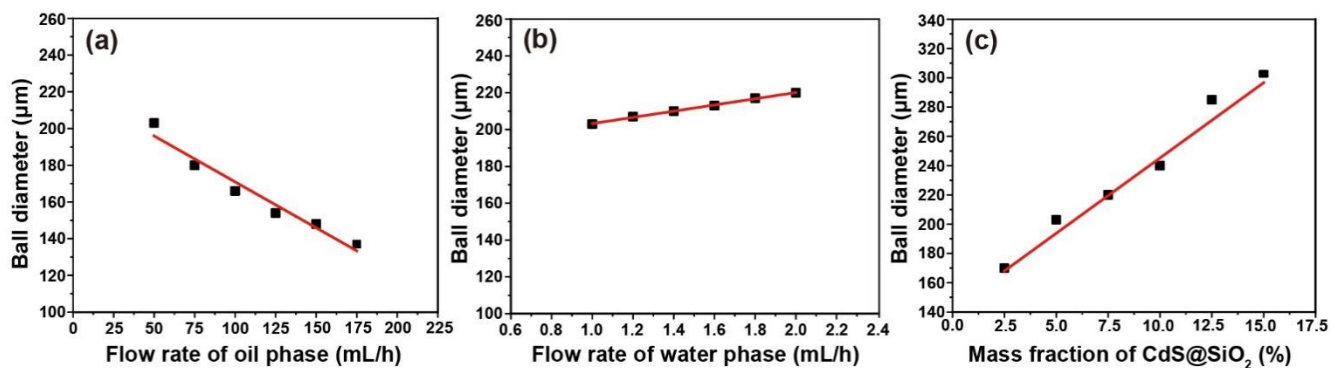

**Figure S7.** (a) The plot of PC ball diameter as a function of flow rate of oil phase; The flow rate and mass fraction of water phase is 1 mL/h and 5%, respectively. (b) the plot of PC ball diameter as a function of flow rate of water phase; The flow rate of oil phase and mass fraction of water phase is 50 mL/h and 5%, respectively. (c) the plot of PC ball diameter as a function of mass fraction of CdS@SiO<sub>2</sub> spheres in water phase; The flow rate of oil phase and water phase is 50 mL/h and 1 mL/h, respectively.

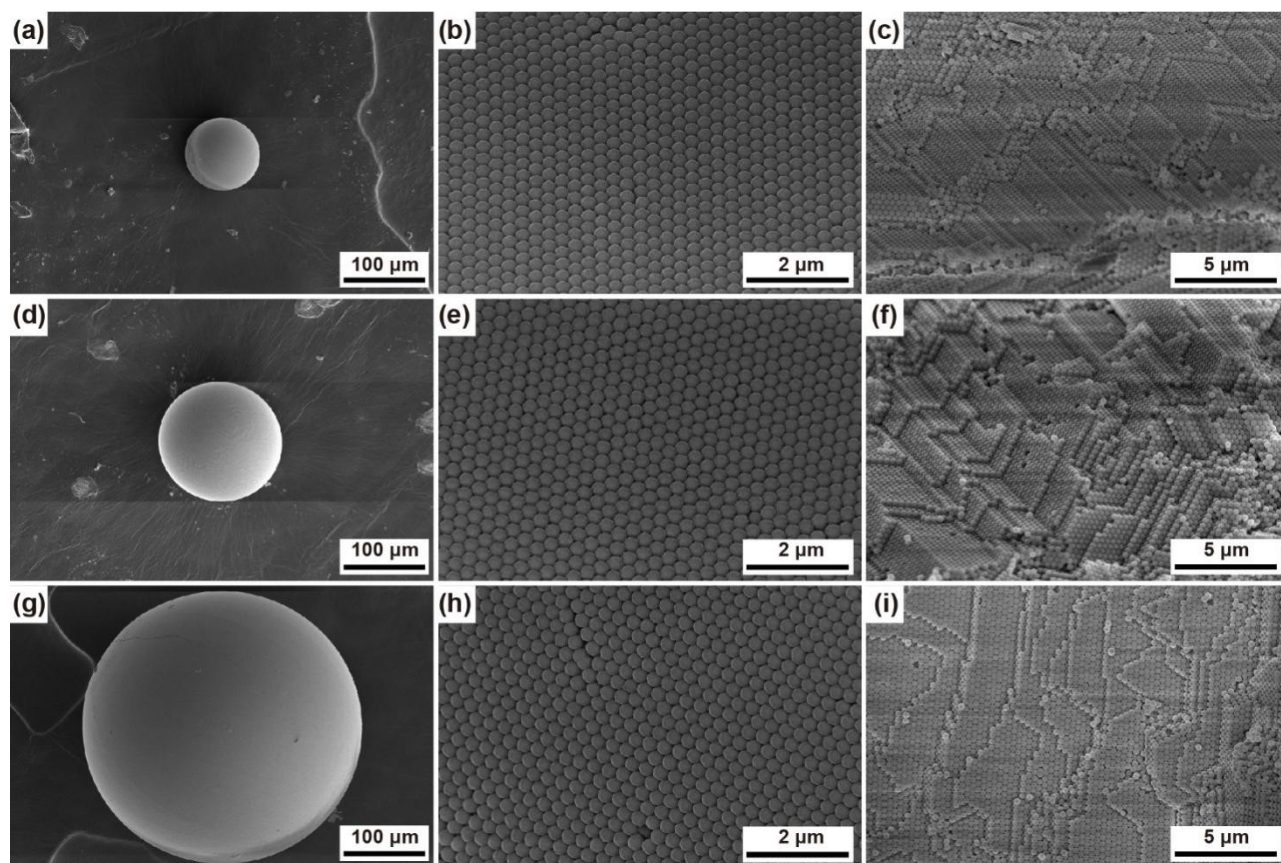

**Figure S8.** SEM images of PC balls with various sizes using 260 nm CdS@SiO<sub>2</sub> spheres as building blocks: (a-c) 80  $\mu\text{m}$ ; (d-f) 150  $\mu\text{m}$ ; (g-i) 340  $\mu\text{m}$

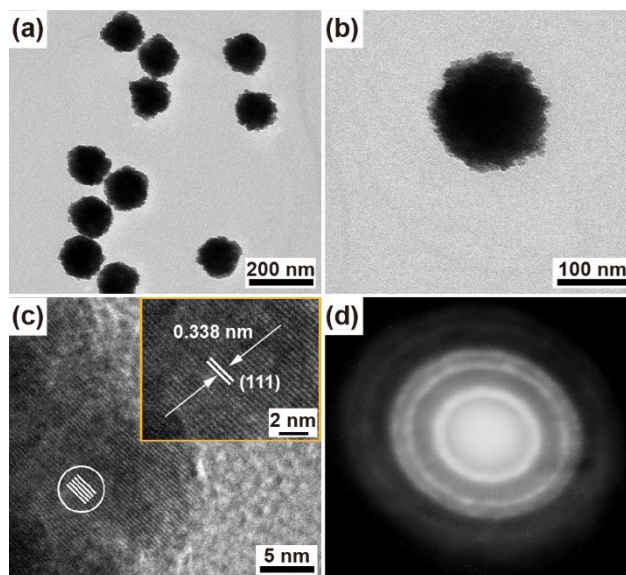

**Figure S9.** (a,b) TEM images of CdS spheres; (c) HR-TEM image of a CdS sphere showing the nanocrystalline domain with PVP capped onto the surface of a nanocrystal; (d) selected area electron diffraction image of a CdS sphere showing the polycrystalline nature

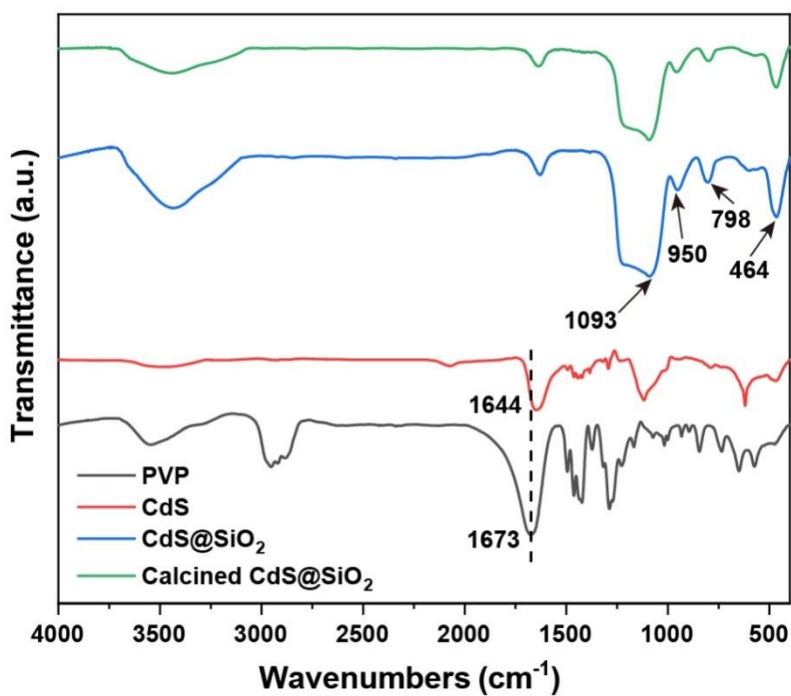

**Figure S10.** FTIR spectra of PVP, CdS spheres, CdS@SiO<sub>2</sub> spheres before and after calcination

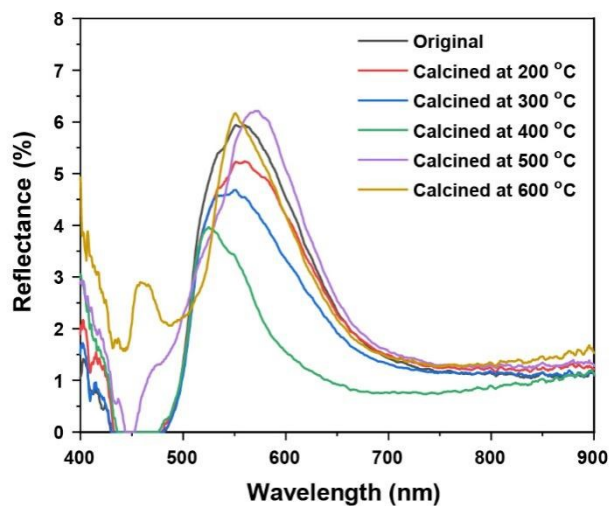

**Figure S11.** Reflection spectra of CdS@SiO<sub>2</sub> PC balls annealed at various temperatures

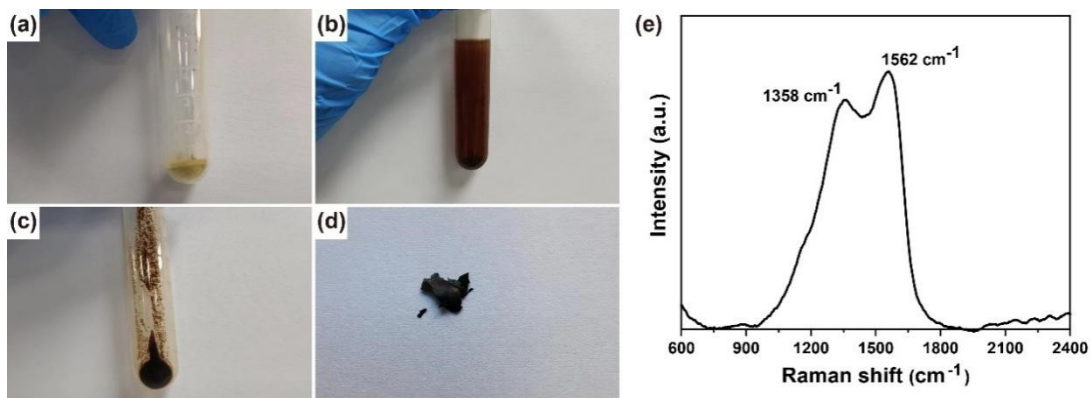

**Figure S12.** Digital photographs of (a) CdS@SiO<sub>2</sub> spheres annealed at 400 °C for 2 h; (b) annealed CdS@SiO<sub>2</sub> spheres dispersed into the mixtures of concentrated hydrochloric acid and HF acid; (c) harvested etched products; (d) dried etched products; (e) Raman spectrum of d



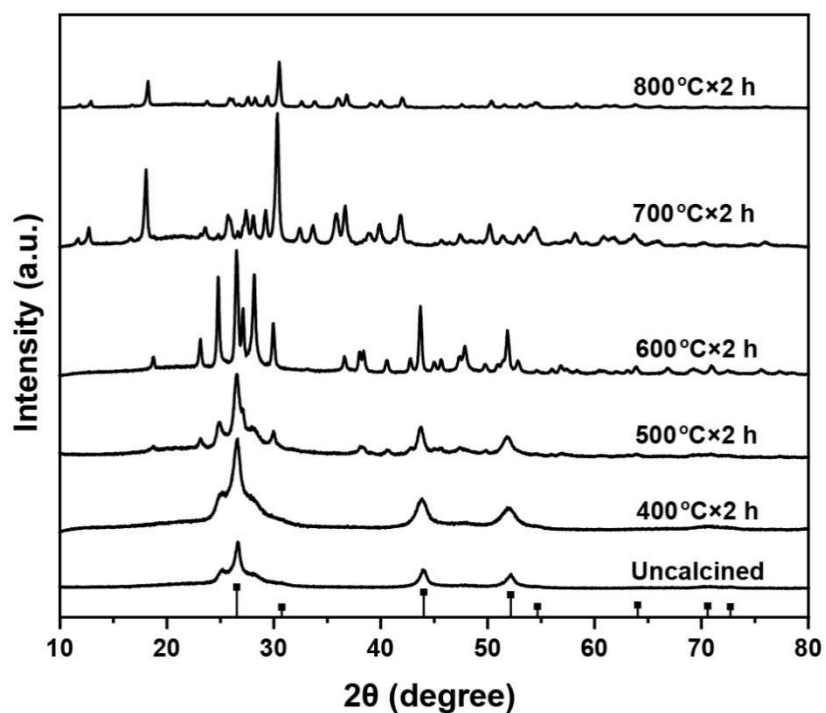

**Figure S13.** XRD patterns of CdS@SiO<sub>2</sub> PC balls calcined at different temperatures for 2 h

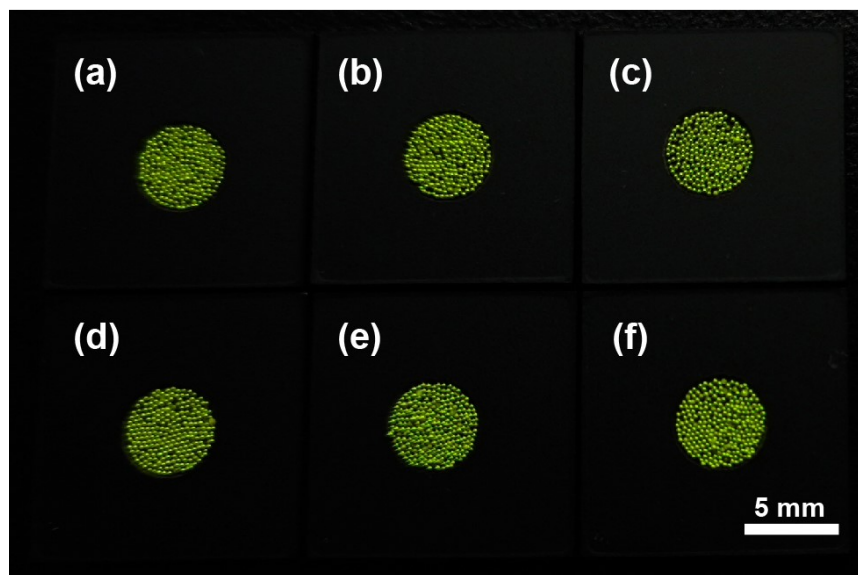

**Figure S14.** Digital photographs of PC pigments with 210 nm CdS@SiO<sub>2</sub> spheres as building blocks calcined at 400 °C for various durations: (a) 0.5 h; (b) 1 h; (c) 2 h; (d) 4 h; (e) 6 h; (f) 8 h

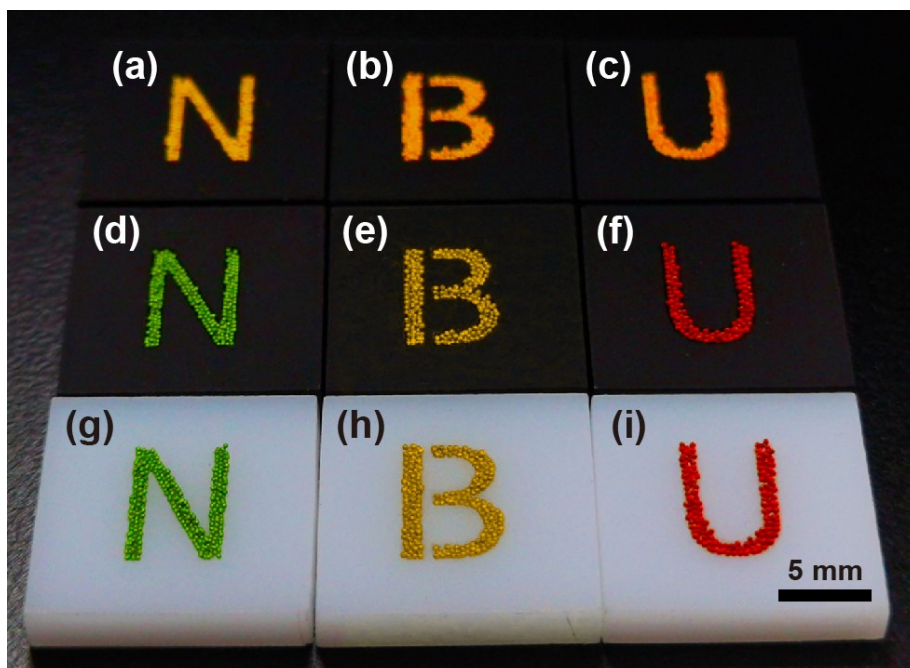

**Figure S15.** Digital photographs of CdS@SiO<sub>2</sub> PC balls and PC pigments shown in Figure 5 taken at a tilted observation direction, indicating angle-independent structural colors of CdS@SiO<sub>2</sub> PC pigments

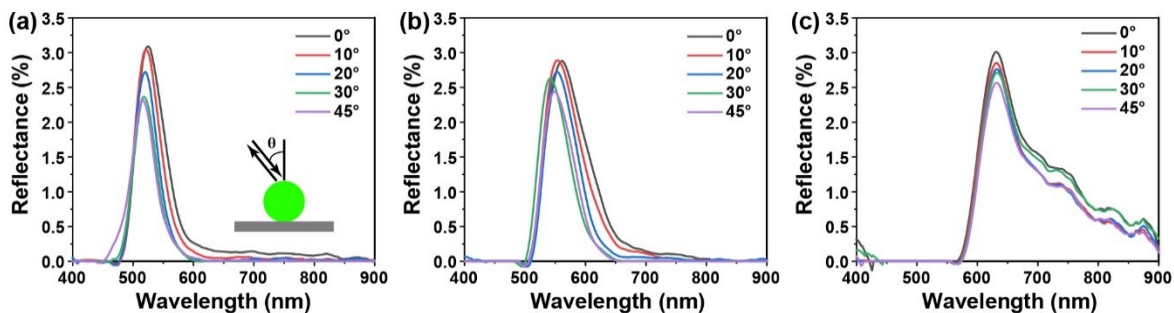

**Figure S16.** Angle-dependent reflection spectra of CdS@SiO<sub>2</sub> PC pigments: (a) green pigments; (b) yellow pigments; (c) red pigments

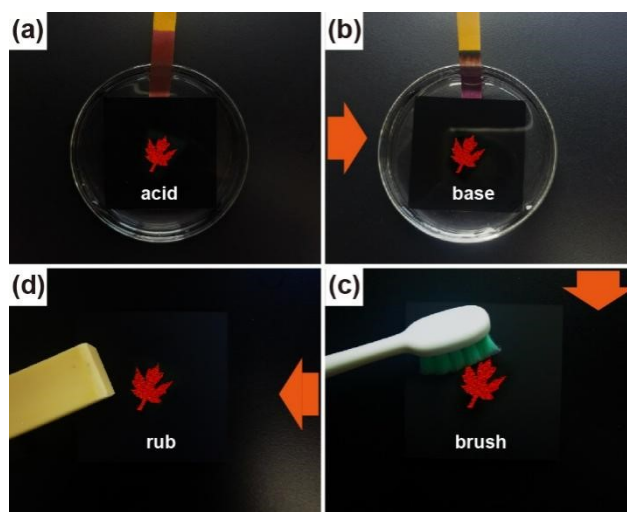

**Figure S17.** Digital photographs of a red leaf painting (a,b) soaked in acid solution (pH=2) and basic solution (pH=12) for 2 h; (c) brushed and (d) rubbed for 100 times
